# Supplementary material
Source: PubMed Central journal article supplement (PMC6811360)
Supplement: Figure_S1.pdf [file Figure_S1.pdf]

*G. portentosa*

*A. cephalotes*

A.

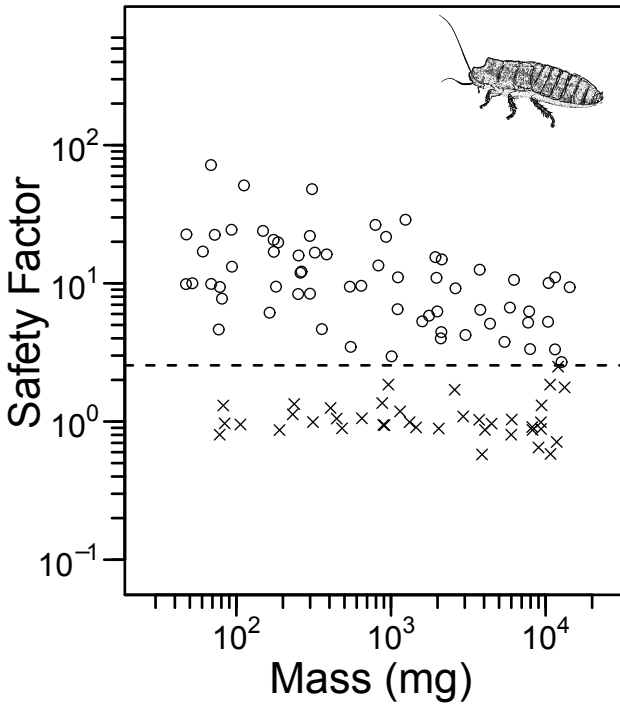

B.

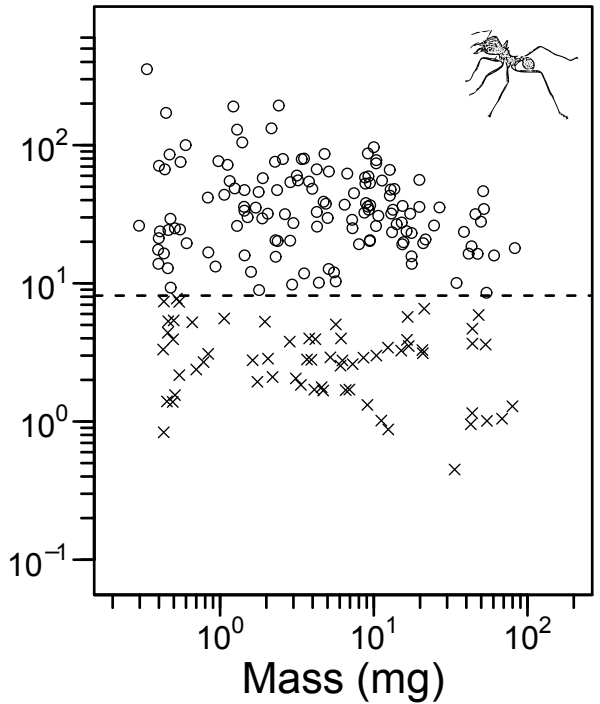

C.

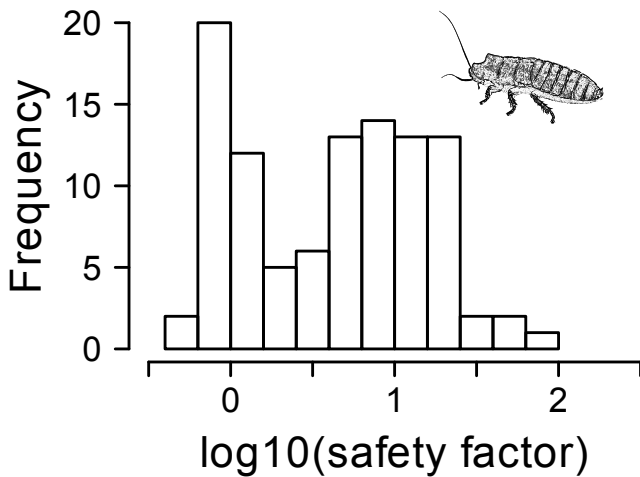

D.

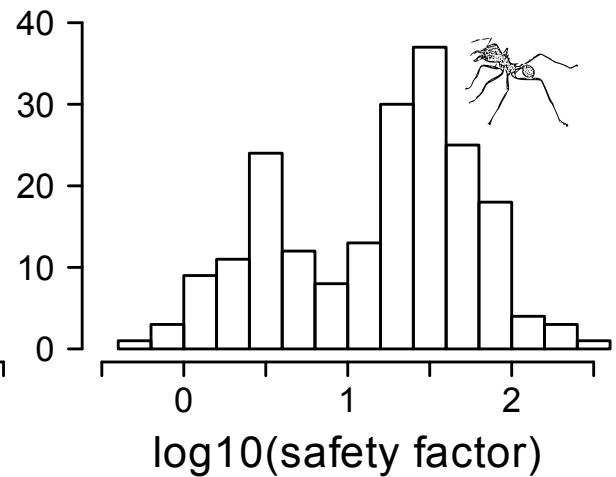

**Figure S1. A & B: Safety factors versus mass and C & D: histograms of safety factor for A. and C. *Gromphadorhina portentosa* (n = 103) and B. & D. *Atta cephalotes* (n = 199) on the centrifuge. For A and B the dashed line indicates separation between those individuals which gripped (circles) and slipped (crosses).**
